# Supplementary material for: ICAM1 Is a Potential Cancer Stem Cell Marker of Esophageal Squamous Cell Carcinoma
Source: PubMed Central journal article supplement (PMC4646358; doi:10.1371/journal.pone.0142834), 2015-11-16
Supplement: pone.0142834.s001.pdf [file pone.0142834.s001.pdf]

**S1 Table.** The list of down-expressed proteins in ICAM1 knockdown CE146T.

| Uniprot                | Protein Name                                                          | Gene Name | ICAM1/shICAM1 | Unique # | Coverage [%] | MW [kDa] | PEP      |
|------------------------|-----------------------------------------------------------------------|-----------|---------------|----------|--------------|----------|----------|
| <a href="#">Q86Y56</a> | HEAT repeat-containing protein 2                                      | HEATR2    | > 1939        | 2        | 4.2          | 93.52    | 9.75E-29 |
| <a href="#">P53999</a> | Activated RNA polymerase II transcriptional coactivator p15           | SUB1      | > 1668        | 2        | 18.9         | 14.40    | 1.87E-34 |
| <a href="#">P28070</a> | Proteasome subunit beta type-4                                        | PSMB4     | > 1541        | 2        | 7.2          | 29.20    | 1.19E-03 |
| <a href="#">P61006</a> | Ras-related protein Rab-8A                                            | RAB8A     | > 1450        | 3        | 35.3         | 23.67    | 3.33E-43 |
| <a href="#">P53007</a> | Tricarboxylate transport protein, mitochondrial                       | SLC25A1   | > 1350        | 3        | 10.1         | 35.05    | 1.97E-09 |
| <a href="#">Q92922</a> | SWI/SNF complex subunit SMARCC1                                       | SMARCC1   | > 1332        | 4        | 7.2          | 122.87   | 9.14E-64 |
| <a href="#">Q8IYB3</a> | Serine/arginine repetitive matrix protein 1                           | SRRM1     | > 1115        | 3        | 5.6          | 103.80   | 3.91E-18 |
| <a href="#">Q00688</a> | Peptidyl-prolyl cis-trans isomerase FKBP3                             | FKBP3     | > 1105        | 2        | 8.0          | 25.18    | 1.60E-08 |
| <a href="#">Q02809</a> | Procollagen-lysine,2-oxoglutarate 5-dioxygenase 1                     | PLOD1     | > 1042        | 7        | 9.2          | 88.27    | 9.73E-06 |
| <a href="#">P56192</a> | Methionine--tRNA ligase, cytoplasmic                                  | MARS      | > 867         | 5        | 5.7          | 101.11   | 1.47E-29 |
| <a href="#">Q96QD8</a> | Sodium-coupled neutral amino acid transporter 2                       | SLC38A2   | > 779         | 2        | 5.3          | 56.03    | 2.15E-11 |
| <a href="#">Q9BZZ5</a> | Apoptosis inhibitor 5                                                 | API5      | > 723         | 6        | 9.5          | 59.00    | 7.16E-10 |
| <a href="#">P13984</a> | General transcription factor IIF subunit 2                            | GTF2F2    | > 703         | 2        | 6.0          | 28.38    | 3.70E-02 |
| <a href="#">P49773</a> | Histidine triad nucleotide-binding protein 1                          | HINT1     | > 697         | 2        | 12.7         | 13.80    | 7.65E-04 |
| <a href="#">Q15785</a> | Mitochondrial import receptor subunit TOM34                           | TOMM34    | > 679         | 3        | 7.8          | 34.56    | 3.54E-01 |
| <a href="#">Q9GZT3</a> | SRA stem-loop-interacting RNA-binding protein, mitochondrial          | SLIRP     | > 677         | 2        | 17.4         | 12.35    | 1.87E-02 |
| <a href="#">P31431</a> | Syndecan-4                                                            | SDC4      | > 610         | 2        | 13.1         | 21.64    | 8.40E-22 |
| <a href="#">P29992</a> | Guanine nucleotide-binding protein subunit alpha-11                   | GNA11     | > 555         | 1        | 7.2          | 42.12    | 1.00E-05 |
| <a href="#">Q9P2B2</a> | Prostaglandin F2 receptor negative regulator [CD315]                  | PTGFRN    | > 549         | 5        | 5.2          | 98.56    | 1.73E-04 |
| <a href="#">Q9Y490</a> | Talin-1                                                               | TLN1      | > 547         | 4        | 2.0          | 269.76   | 1.45E-07 |
| <a href="#">P00846</a> | ATP synthase subunit a                                                | MT-ATP6   | > 536         | 2        | 6.8          | 26.05    | 6.68E-03 |
| <a href="#">Q12904</a> | Aminoacyl tRNA synthase complex-interacting multifunctional protein 1 | AIMP1     | > 530         | 2        | 5.7          | 37.04    | 5.28E-18 |
| <a href="#">P14868</a> | Aspartate--tRNA ligase, cytoplasmic                                   | DARS      | > 512         | 5        | 8.6          | 57.14    | 2.30E-10 |
| <a href="#">Q94903</a> | Proline synthase co-transcribed bacterial homolog protein             | PROSC     | > 504         | 2        | 8.7          | 34.04    | 3.90E-03 |
| <a href="#">Q9Y3I0</a> | tRNA-splicing ligase RtcB homolog                                     | RTCB      | > 501         | 4        | 7.7          | 55.21    | 7.97E-08 |
| <a href="#">P51610</a> | Host cell factor 1                                                    | HCFC1     | > 486         | 3        | 1.7          | 213.47   | 3.26E-01 |
| <a href="#">Q9UHG3</a> | Prenylcysteine oxidase 1                                              | PCYOX1    | > 483         | 3        | 5.5          | 56.64    | 3.24E-13 |
| <a href="#">Q00796</a> | Sorbitol dehydrogenase                                                | SORD      | > 476         | 2        | 7.3          | 38.32    | 9.68E-10 |
| <a href="#">Q13501</a> | Sequestosome-1                                                        | SQSTM1    | > 474         | 3        | 9.3          | 47.69    | 3.86E-10 |
| <a href="#">P48509</a> | CD151 antigen                                                         | CD151     | > 470         | 4        | 12.3         | 28.30    | 2.70E-03 |
| <a href="#">Q03518</a> | Antigen peptide transporter 1                                         | TAP1      | > 459         | 2        | 3.3          | 87.18    | 2.45E-06 |
| <a href="#">Q93009</a> | Ubiquitin carboxyl-terminal hydrolase 7                               | USP7      | > 452         | 9        | 7.3          | 128.30   | 1.49E-09 |

|                        |                                                                 |         |       |   |      |        |          |
|------------------------|-----------------------------------------------------------------|---------|-------|---|------|--------|----------|
| <a href="#">Q14498</a> | RNA-binding protein 39                                          | RBM39   | > 444 | 4 | 8.5  | 59.38  | 2.82E-09 |
| <a href="#">O75949</a> | Transmembrane protein FAM155B                                   | FAM155B | > 432 | 2 | 4.3  | 34.47  | 1.93E-02 |
| <a href="#">P36776</a> | Lon protease homolog, mitochondrial                             | LONP1   | > 405 | 4 | 4.0  | 106.49 | 1.40E-11 |
| <a href="#">Q16531</a> | DNA damage-binding protein 1                                    | DDB1    | > 397 | 3 | 2.1  | 126.97 | 5.37E-02 |
| <a href="#">P15121</a> | Aldehyde reductase                                              | AKR1B1  | > 396 | 2 | 5.4  | 35.85  | 6.09E-05 |
| <a href="#">P51659</a> | Peroxisomal multifunctional enzyme type 2                       | HSD17B4 | > 393 | 3 | 6.0  | 79.69  | 3.57E-22 |
| <a href="#">P33947</a> | ER lumen protein retaining receptor 2                           | KDELR2  | > 365 | 2 | 9.0  | 24.42  | 4.12E-02 |
| <a href="#">P53801</a> | Pituitary tumor-transforming gene 1 protein-interacting protein | PTTG1IP | > 362 | 2 | 13.9 | 20.32  | 1.07E-13 |
| <a href="#">Q5VTR2</a> | E3 ubiquitin-protein ligase BRE1A                               | RNF20   | > 362 | 3 | 3.0  | 113.66 | 3.20E-05 |
| <a href="#">O00629</a> | Importin subunit alpha-3                                        | KPNA4   | > 350 | 4 | 12.1 | 57.89  | 5.65E-43 |
| <a href="#">O43175</a> | D-3-phosphoglycerate dehydrogenase                              | PHGDH   | > 349 | 2 | 4.9  | 56.65  | 2.17E-13 |
| <a href="#">P39748</a> | Flap endonuclease 1                                             | FEN1    | > 342 | 4 | 8.7  | 42.59  | 1.28E-03 |
| <a href="#">Q14CM0</a> | FERM and PDZ domain-containing protein 4                        | FRMPD4  | > 338 | 2 | 1.2  | 144.38 | 1.44E-01 |
| <a href="#">Q13492</a> | Phosphatidylinositol-binding clathrin assembly protein          | PICALM  | > 333 | 2 | 3.7  | 70.75  | 2.23E-03 |
| <a href="#">Q02338</a> | D-beta-hydroxybutyrate dehydrogenase, mitochondrial             | BDH1    | > 325 | 2 | 4.4  | 38.16  | 2.83E-03 |
| <a href="#">Q99460</a> | 26S proteasome non-ATPase regulatory subunit 1                  | PSMD1   | > 323 | 3 | 4.7  | 105.84 | 3.29E-03 |
| <a href="#">P11413</a> | Glucose-6-phosphate 1-dehydrogenase                             | G6PD    | > 301 | 4 | 6.4  | 63.83  | 6.63E-02 |
| <a href="#">O15427</a> | Monocarboxylate transporter 4                                   | SLC16A3 | > 289 | 2 | 4.5  | 49.47  | 3.59E-05 |
| <a href="#">P82933</a> | 28S ribosomal protein S9, mitochondrial                         | MRPS9   | > 275 | 3 | 6.6  | 45.83  | 1.76E-11 |
| <a href="#">Q14739</a> | Lamin-B receptor                                                | LBR     | > 267 | 4 | 4.6  | 70.70  | 2.12E-02 |
| <a href="#">O14776</a> | Transcription elongation regulator 1                            | TCERG1  | > 257 | 4 | 3.6  | 123.90 | 3.56E-05 |
| <a href="#">P06756</a> | Integrin alpha-V [CD51]                                         | ITGAV   | > 254 | 4 | 3.0  | 116.04 | 1.67E-02 |
| <a href="#">P13674</a> | Prolyl 4-hydroxylase subunit alpha-1                            | P4HA1   | > 253 | 3 | 4.7  | 61.05  | 8.34E-05 |
| <a href="#">P26358</a> | DNA (cytosine-5)-methyltransferase 1                            | DNMT1   | > 253 | 4 | 3.4  | 184.82 | 2.61E-06 |
| <a href="#">Q5JTH9</a> | RRP12-like protein                                              | RRP12   | > 251 | 2 | 1.8  | 143.70 | 2.97E-09 |
| <a href="#">Q9BUQ8</a> | Probable ATP-dependent RNA helicase DDX23                       | DDX23   | > 248 | 2 | 2.4  | 95.58  | 5.48E-04 |
| <a href="#">Q8WXH0</a> | Nesprin-2                                                       | SYNE2   | > 246 | 2 | 0.2  | 798.85 | 7.41E-02 |
| <a href="#">P28340</a> | DNA polymerase delta catalytic subunit                          | POLD1   | > 235 | 3 | 3.8  | 126.39 | 8.35E-05 |
| <a href="#">O00154</a> | Cytosolic acyl coenzyme A thioester hydrolase                   | ACOT7   | > 233 | 2 | 7.0  | 40.46  | 2.67E-38 |
| <a href="#">Q9Y3F4</a> | Serine-threonine kinase receptor-associated protein             | STRAP   | > 230 | 3 | 9.9  | 39.78  | 7.53E-25 |
| <a href="#">Q9NVA2</a> | Septin-11                                                       | SEPT11  | > 222 | 2 | 7.7  | 50.82  | 2.78E-05 |
| <a href="#">Q9UK59</a> | Lariat debranching enzyme                                       | DBR1    | > 216 | 2 | 3.5  | 61.55  | 2.20E-04 |
| <a href="#">O43290</a> | U4/U6.U5 tri-snRNP-associated protein 1                         | SART1   | > 214 | 3 | 4.0  | 90.25  | 1.77E-12 |
| <a href="#">Q14151</a> | Scaffold attachment factor B2                                   | SAFB2   | > 213 | 5 | 6.7  | 102.85 | 6.63E-24 |
| <a href="#">Q15293</a> | Reticulocalbin-1                                                | RCN1    | > 213 | 2 | 5.7  | 38.89  | 6.07E-18 |

|               |                                                               |          |       |    |      |        |           |
|---------------|---------------------------------------------------------------|----------|-------|----|------|--------|-----------|
| <u>Q9NSD9</u> | Phenylalanine--tRNA ligase beta subunit                       | FARSB    | > 209 | 2  | 3.7  | 66.12  | 6.27E-12  |
| <u>Q96QK1</u> | Vacuolar protein sorting-associated protein 35                | VPS35    | > 208 | 3  | 4.3  | 91.71  | 1.77E-24  |
| <u>P11387</u> | DNA topoisomerase 1                                           | TOP1     | > 207 | 2  | 2.6  | 90.73  | 3.69E-08  |
| <u>Q96ST3</u> | Paired amphipathic helix protein Sin3a                        | SIN3A    | > 198 | 3  | 2.1  | 145.17 | 5.55E-01  |
| <u>P50995</u> | Annexin A11                                                   | ANXA11   | > 192 | 2  | 3.0  | 65.60  | 2.20E-10  |
| <u>Q99536</u> | Synaptic vesicle membrane protein VAT-1 homolog               | VAT1     | > 191 | 2  | 2.8  | 41.92  | 4.49E-03  |
| <u>P08962</u> | CD63 antigen                                                  | CD63     | > 185 | 2  | 6.7  | 25.64  | 1.43E-03  |
| <u>Q7Z2K6</u> | Endoplasmic reticulum metalloproteinase 1                     | ERMP1    | > 183 | 2  | 1.8  | 100.23 | 1.83E-02  |
| <u>O43747</u> | AP-1 complex subunit gamma-1                                  | AP1G1    | > 180 | 3  | 5.3  | 94.14  | 1.13E-34  |
| <u>Q9UGP8</u> | Translocation protein SEC63 homolog                           | SEC63    | > 171 | 2  | 2.6  | 88.00  | 1.45E-06  |
| <u>Q9Y6M1</u> | Insulin-like growth factor 2 mRNA-binding protein 2           | IGF2BP2  | > 158 | 3  | 4.6  | 66.79  | 1.80E-04  |
| <u>Q92900</u> | Regulator of nonsense transcripts 1                           | UPF1     | > 157 | 3  | 3.1  | 124.34 | 1.92E-02  |
| <u>P46060</u> | Ran GTPase-activating protein 1                               | RANGAP1  | > 153 | 2  | 3.7  | 63.54  | 1.94E-12  |
| <u>O75150</u> | E3 ubiquitin-protein ligase BRE1B                             | RNF40    | > 152 | 3  | 2.2  | 113.65 | 1.95E-02  |
| <u>Q8N1F7</u> | Nuclear pore complex protein Nup93                            | NUP93    | > 149 | 3  | 3.7  | 93.49  | 8.25E-29  |
| <u>Q9BUJ2</u> | Heterogeneous nuclear ribonucleoprotein U-like protein 1      | HNRNPUL1 | > 148 | 2  | 2.5  | 95.74  | 3.19E-02  |
| <u>O75874</u> | Isocitrate dehydrogenase [NADP] cytoplasmic                   | IDH1     | > 147 | 2  | 5.8  | 46.66  | 4.04E-05  |
| <u>Q7Z6Z7</u> | E3 ubiquitin-protein ligase HUWE1                             | HUWE1    | > 136 | 4  | 0.9  | 482.14 | 1.89E-07  |
| <u>P30419</u> | Glycylpeptide N-tetradecanoyltransferase 1                    | NMT1     | > 121 | 2  | 4.4  | 56.81  | 1.33E-03  |
| <u>Q14247</u> | Src substrate cortactin                                       | CTTN     | > 110 | 2  | 2.7  | 70.96  | 1.57E-02  |
| <u>Q08345</u> | Epithelial discoidin domain-containing receptor 1 [CD167a]    | DDR1     | > 109 | 2  | 2.1  | 101.80 | 3.28E-02  |
| <u>Q9HAV4</u> | Exportin-5                                                    | XPO5     | > 63  | 2  | 1.4  | 136.31 | 8.91E-02  |
| <u>P54577</u> | Tyrosine--tRNA ligase, cytoplasmic                            | YARS     | 58.2  | 5  | 9.3  | 59.14  | 3.82E-13  |
| <u>P01024</u> | Complement C3                                                 | C3       | 46.6  | 15 | 10.2 | 187.15 | 1.88E-126 |
| <u>Q9Y295</u> | Developmentally-regulated GTP-binding protein 1               | DRG1     | 26.3  | 3  | 11.2 | 40.54  | 3.39E-86  |
| <u>Q95197</u> | Reticulon-3                                                   | RTN3     | 25.9  | 2  | 5.6  | 112.61 | 5.79E-48  |
| <u>Q9Y320</u> | Thioredoxin-related transmembrane protein 2                   | TMX2     | 23.4  | 3  | 8.1  | 42.47  | 1.87E-02  |
| <u>P11498</u> | Pyruvate carboxylase, mitochondrial                           | PC       | 23.3  | 4  | 4.5  | 129.63 | 7.28E-03  |
| <u>O43719</u> | HIV Tat-specific factor 1                                     | HTATSF1  | 15.9  | 6  | 6.8  | 85.85  | 9.10E-69  |
| <u>P16422</u> | Epithelial cell adhesion molecule [CD326]                     | EPCAM    | 15.2  | 5  | 12.6 | 37.89  | 7.84E-34  |
| <u>P47897</u> | Glutamine--tRNA ligase                                        | QARS     | 14.7  | 3  | 4.6  | 87.80  | 3.10E-06  |
| <u>P49821</u> | NADH dehydrogenase [ubiquinone] flavoprotein 1, mitochondrial | NDUFV1   | 14.2  | 3  | 6.7  | 50.82  | 4.10E-03  |
| <u>P35249</u> | Replication factor C subunit 4                                | RFC4     | 13.4  | 4  | 12.4 | 39.68  | 3.48E-08  |
| <u>P69849</u> | Nodal modulator 3                                             | NOMO3    | 13.1  | 3  | 2.8  | 139.44 | 2.17E-08  |
| <u>P54136</u> | Arginine--tRNA ligase, cytoplasmic                            | RARS     | 12.3  | 3  | 3.8  | 75.38  | 1.13E-07  |

|               |                                          |        |      |   |      |        |          |
|---------------|------------------------------------------|--------|------|---|------|--------|----------|
| <u>Q92616</u> | Translational activator GCN1             | GCN1L1 | 12.0 | 5 | 1.8  | 292.75 | 1.68E-07 |
| <u>P05362</u> | Intercellular adhesion molecule 1 [CD54] | ICAM1  | 11.8 | 4 | 10.0 | 57.83  | 1.38E-06 |
